# Supplementary material
Source: Springer Nature journal article supplement (https://www.springermedizin.de/resource/supplementary/12889_2013_5851_MOESM7_ESM.pdf/9496392)

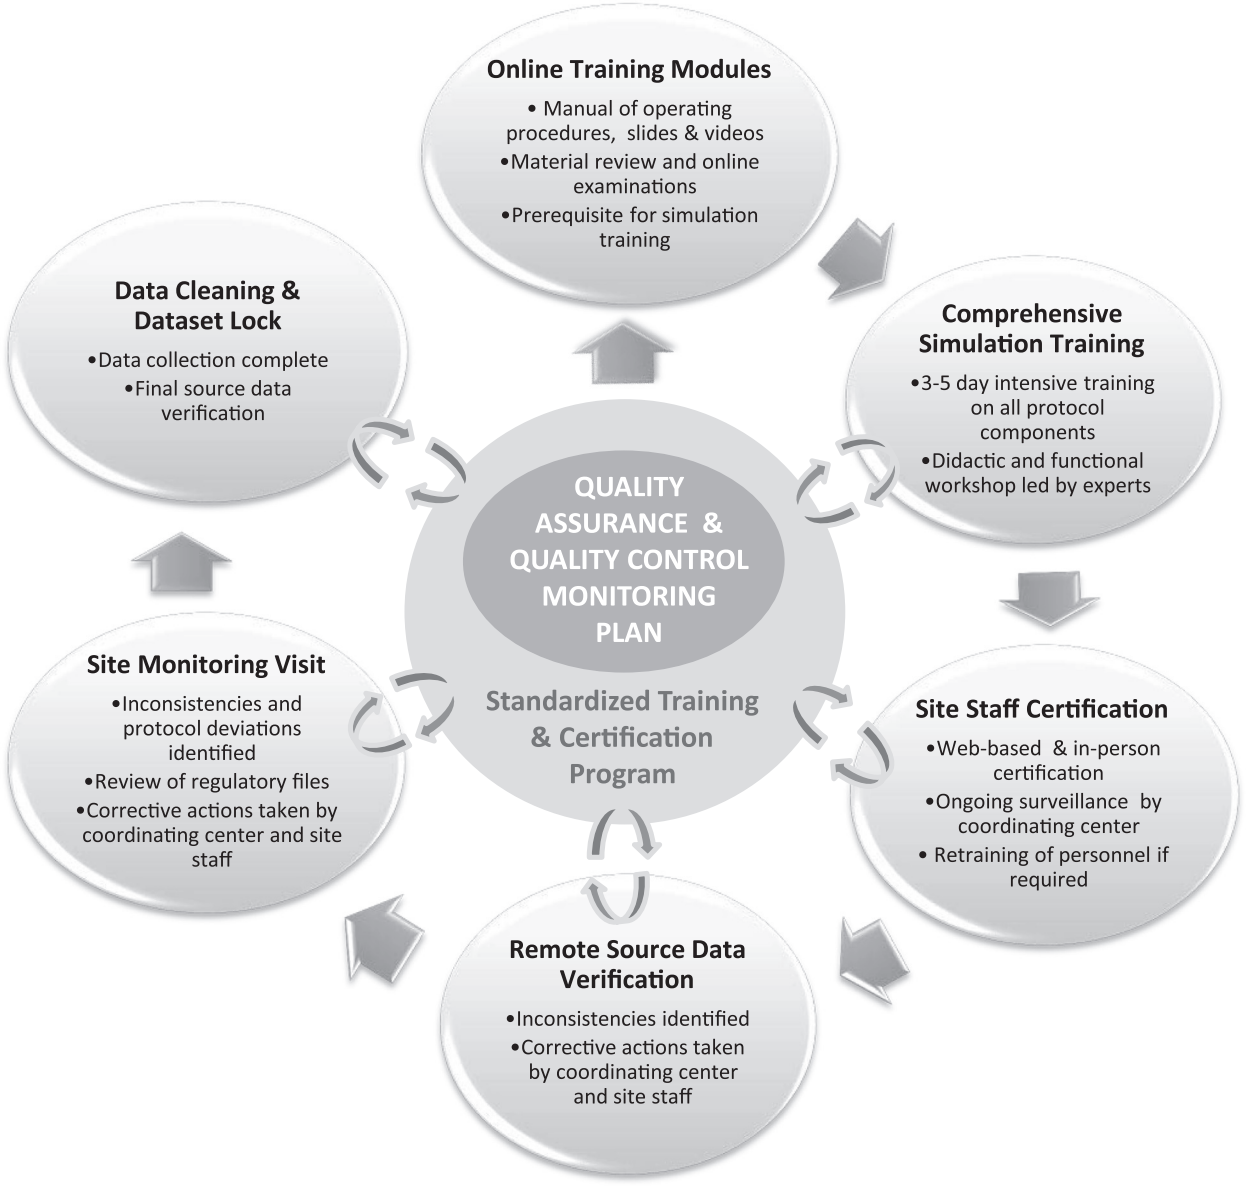

Supplement: MOESM7 [file 9496392]
